# Supplementary material for: Effect of Nurse-facilitated Educational Intervention on Parents’ Knowledge and Perception of Safety of Human Papillomavirus Vaccine in Ogun State, Nigeria
Source: Research Square preprint supplement (doi:10.21203/rs.3.rs-6444469/v1), 2025-05-12
Supplement: Supplementary file 1 [file f80d220c2f7c68e8ad52f197.docx]

**Informed Consent Form**

**Title of Research: EFFECT OF NURSE-FACILITATED EDUCATIONAL INTERVENTION ON PARENTS’ KNOWLEDGE AND PERCEPTION OF SAFETY OF HUMAN PAPILLOMAVIRUS VACCINE IN OGUN STATE, NIGERIA**

**Purpose of Research:** The main objective of this study is to determine the effect of nurse-facilitated interactive educational interventions on the knowledge and perception of safety of Human Papillomavirus (HPV) vaccines among parents in Ogun state, Nigeria.

**Potential risks:** The study is a test paper and questionnaire-based survey. Therefore, no harm whatsoever is anticipated concerning any of the participants. While there are no direct benefits to those participating in the study, the information learned from you may help health policy to better the conditions of secondary health care facilities.

**Cost to the participants:** This research will cost the participants nothing except their cooperation and time.

**Potential benefit(s):** It is hoped that with your participation a better understanding will be gained by parents on the benefit of HPV vaccine.

**Confidentiality:** All information obtained in this study will be given code numbers and no name will be recorded. This cannot be linked to you in any way and your name or any identifier will not be used in any publication or report from this study.

**Voluntaries:** Your participation in this research is entirely voluntary i.e., you do not have to participate if you don't want to. It is up to you to decide whether or not to take part. Refusal to take part will involve no penalty. If you do decide to take part, you will be given this information sheet to keep (and be asked to sign a consent form).

**Due inducement(s):** You will not be compensated or be paid any fees for participating in this research.

**Any apparent or potential conflict of interest:**

I am not aware of any other information that may cause me not to do the research work with fairness.

**Statement of the person obtaining informed consent:**

I have fully explained this research to ____________________________________ and have given sufficient information, including risks and benefits, to make an informed decision.

DATE: _____________________ SIGNATURE: ____________________________

NAME: ______________________________________________

**What happens to Research Participants and Communities when the research is over:**

The researcher will inform you of the outcome of the research through the Local Government. There is no conflict of interest whatsoever.

**Statement of the person giving consent:**

I have read the description of the research and have had it translated into a language I understand. I have also discussed this with the researcher to my satisfaction. I understand that my participation is voluntary. I know enough about the purpose, methods, risks, and benefits of the research study to judge that I want to take part in it. I understand that I may freely stop being part of this study at any time. I have received a copy of this consent form and an additional information sheet to keep for myself.

DATE: ___________________ SIGNATURE: _________________________________

If you have any questions about this study, please feel free to contact:

**Name**: AMINU SERIFAT OMOBOLANLE

**Phone number**: 08038521961
